# Supplementary material for: Wire-supported CdSe nanowire array photoelectrochemical solar cells
Source: Royal Society of Chemistry journal article supplement (doi:10.1039/c2cp00024e), 2012-01-01
Supplement: c2cp00024e.pdf [file c2cp00024e.pdf]

# Wire-Supported CdSe Nanowire Array Photoelectrochemical Solar Cells

Luhui Zhang,<sup>1</sup> Enzheng Shi,<sup>1</sup> Zhen Li,<sup>2</sup> Peixu Li,<sup>2</sup> Yi Jia,<sup>2</sup> Chunyan Ji,<sup>1</sup> Jinqian Wei,<sup>2</sup>  
Kunlin Wang,<sup>2</sup> Hongwei Zhu,<sup>2</sup> Dehai Wu,<sup>2</sup> Anyuan Cao<sup>1\*</sup>

<sup>1</sup> Department of Materials Science and Engineering, College of Engineering, Peking University,  
Beijing 100871, P. R. China

<sup>2</sup> Key Laboratory for Advanced Materials Processing Technology and Department of Mechanical  
Engineering, Tsinghua University, Beijing 100084, P. R. China

\*Corresponding authors. Email: anyuan@pku.edu.cn

## **Supporting Information:**

- 1. Figure S1. Transmission electron microscopy (TEM) images of CdSe nanowires.**
- 2. Figure S2. Scanning electron microscopy (SEM) images of Ti wire-supported CdSe nanostructures.**
- 3. Figure S3. J-V curves of a solar cell with Pt counter electrode.**
- 4. Figure S4. IPCE spectrum of a planar cell.**

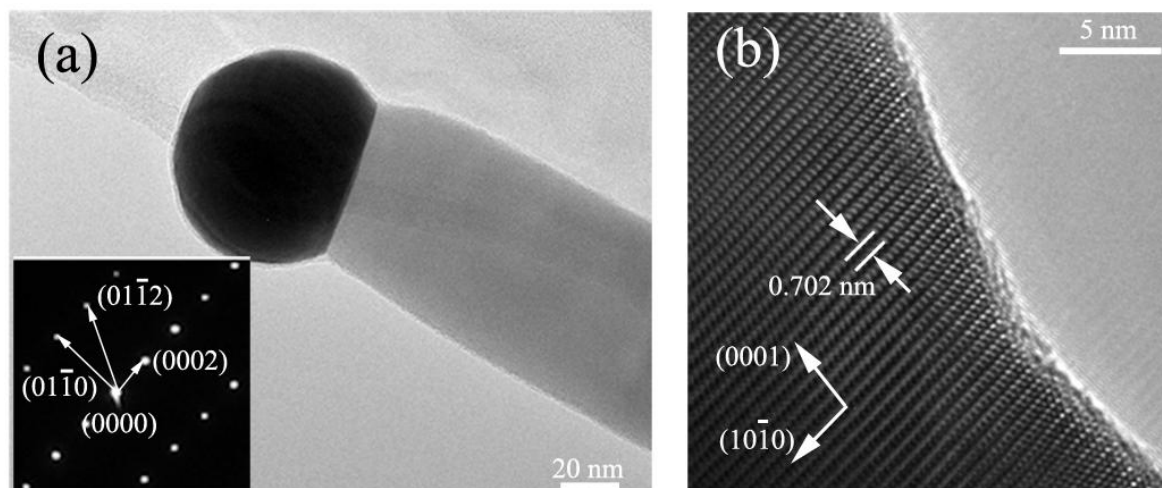

**Figure S1. TEM images of CdSe nanowires.** (a) TEM image of an Au nanoparticle at the tip of a CdSe nanowire. Inset, selected area electron diffraction of the CdSe nanowire. (b) High-resolution TEM image of the CdSe nanowire.

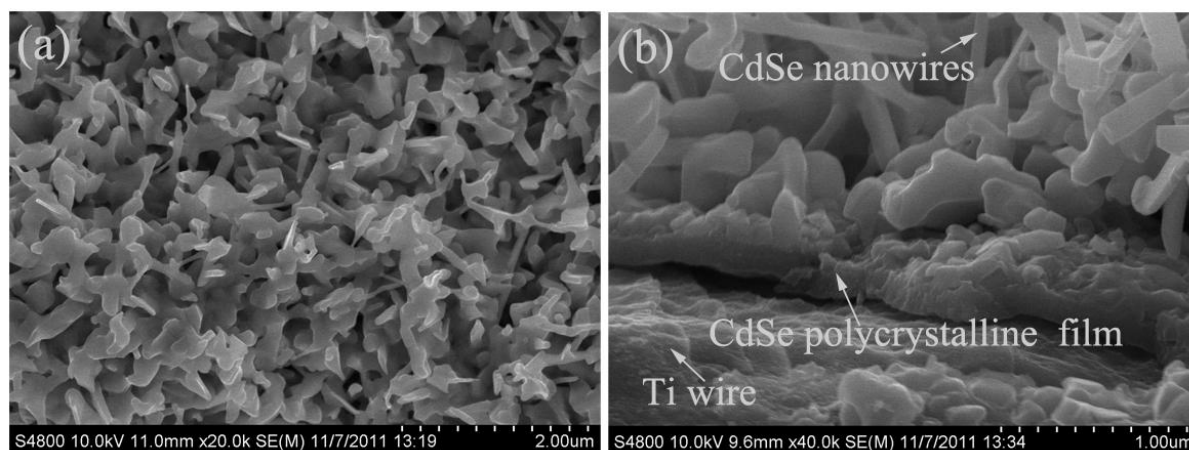

**Figure S2. SEM images of Ti wire-supported CdSe nanostructures.** (a) SEM image of a CdSe polycrystalline film underneath the nanowire arrays which have been removed by ultrasonic process. (b) SEM image of a cross section of Ti wire-supported CdSe nanowire array showing that CdSe nanowires grow from the polycrystalline film.

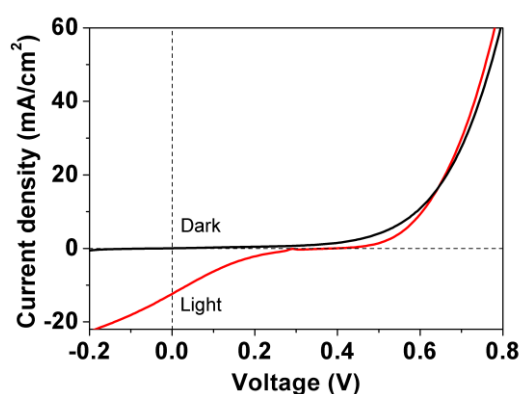

**Figure S3. J-V curves of a solar cell with Pt counter electrode.** The Pt electrode was placed in parallel to the Ti-CdSe wire with very short distance and filled with electrolyte in between to simulate the traditional photoelectrochemical cell.

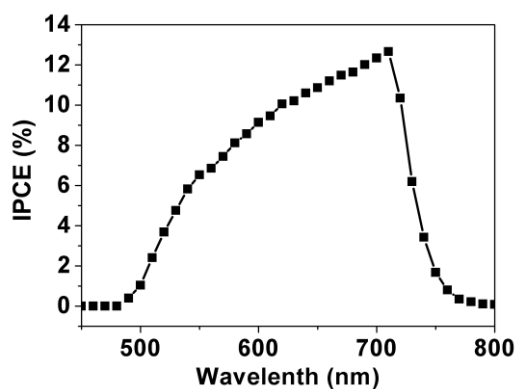

**Figure S4. IPCE spectrum of a planar cell.** The solar cell was based on CdSe nanowires grown on a Ti foil substrate with the same cell configuration.
